# Supplementary material for: Comparison of soil characteristics from geophysical and geochemical techniques along a climate and ecological gradient, Chilean Coastal Cordillera (26° to 38° S)
Source: Copernicus journal article supplement (doi:10.5194/soil-2020-33), 2020-06-15
Supplement: Supplementary file [file soil-2020-33-RC2-supplement.pdf]

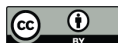

1 **Comparison of soil characteristics from geophysical and geochemical**  
2 **techniques along a climate and ecological gradient, Chilean Coastal**  
3 **Cordillera (26° to 38° S)**

4

5 Mirjam Schaller<sup>1\*</sup>

6 Igor Dal Bo<sup>2\*</sup>

7 Todd A. Ehlers<sup>1</sup>

8 Anja Klotzsche<sup>2</sup>

9 Reinhard Drews<sup>1</sup>

10 Juan Pablo Fuentes Espoz<sup>3</sup>

11 Jan van der Kruk<sup>2</sup>

12

13 <sup>1</sup> Department of Geosciences, University of Tübingen, Germany,

14 Schnarrenbergstrasse 94-96, 72076 Tübingen, Germany

15 <sup>2</sup> Agrosphere (IBG-3), Institute of Bio- and Geosciences, Forschungszentrum

16 Jülich, 52428, Jülich, Germany

17 <sup>3</sup> University of Chile, Department of Silviculture and Nature Conservation, Av.

18 Santa Rosa 11315, La Pintana, Santiago RM, Chile

19 \* Authors contributed equally.

20

21 Corresponding author: E-mail: Mirjam Schaller (mirjam.schaller@uni-

22 tuebingen.de)

23

24

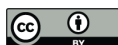

## 25 **Abstract**

26 In this study, we combine geophysical observations from Ground Penetrating  
27 Radar (GPR) with soil physical, and geochemical properties from pedons excavated  
28 in four study areas spanning 1,300 km of the climate and ecological gradient in the  
29 Chilean Coastal Cordillera. Our aims are to: (1) relate GPR observations to depth  
30 varying soil physical and weathering-related chemical properties in adjacent  
31 pedons, and (2) evaluate the lateral extent to which these properties can be  
32 extrapolated along a hillslope using GPR observations. Physical observations  
33 considered include soil bulk density and grain size distribution whereas chemical  
34 observations are based on major and trace element analysis. Results indicate that  
35 visually-determined soil thickness and the transition from the soil B to C horizons  
36 generally correlate with maximums in the 500 and 1000 MHz GPR envelope profiles.  
37 To a lesser degree, these maximums in the GPR envelope profiles agree with  
38 maximums in weathering related indices such as the Chemical Index of Alteration  
39 (CIA) and the chemical index of mass transfer ( $\tau$ ) for Na. Finally, we find that up-  
40 scaling from the pedon to hillslope scale is possible with geophysical methods for  
41 certain pedon properties available. Taken together, these findings suggest that the  
42 GPR profiles along hillslopes can be used to infer lateral thickness variations in soil  
43 horizons, and to some degree the physical and chemical variations with depth.

44

45 Keywords: soil, saprolite, hillslope, climate, vegetation, geophysics

46

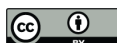

## 47 **1 Introduction**

48 Weathering of bedrock by biotic and abiotic processes produces regolith which  
 49 provides resources for life. Most biota is found in an upper mobile layer (soil), which  
 50 is underlain by an immobile layer of weathered material (saprolite) that replenishes  
 51 the soil with nutrients through chemical weathering and erosion that drives nutrient  
 52 uplift towards the surface (e.g., Porder et al., 2007). The thickness and production  
 53 of soil is influenced by topography, tectonically driven rock uplift, climate, biota,  
 54 composition (mineral content), and time (e.g., Hilgard, 1914; Jenny, 1994).  
 55 However, sub-surface variations in soil thickness at the scale of hillslopes are  
 56 difficult to quantify because of lack of exposure. Thus, subsurface imaging by  
 57 geophysical techniques, when calibrated to soil pit excavations (pedons), offers one  
 58 potential mean to characterize spatial variability in soil thickness and soil properties  
 59 (e.g., Mellett, 1995; Doolittle and Collins, 1995; Miller et al., 2004). Here, we  
 60 evaluate the utility of applying Ground Penetrating Radar (GPR) to map variations  
 61 in soil properties in diverse climate and ecological settings with stark differences in  
 62 physical and chemical soil properties.

63 Previous work has attributed spatial variations in soil thickness to hillslope  
 64 curvature (Heimsath et al., 1997; Heimsath et al., 1999), which determines the  
 65 downslope rate of mass transport assuming a diffusion based geomorphic transport  
 66 law (e.g., Roering et al., 2001). However, this single point information is spatially  
 67 restricted and pedon excavations are time-intensive. To further understand spatial  
 68 variations in soil and saprolite thickness, other approaches such as modeling (e.g.,  
 69 Scarpone et al., 2016) and geophysical imaging (e.g., see summary in Parsekian  
 70 et al., 2015) have been applied. For example, soil thickness variations were  
 71 extrapolated from Digital Elevation Models (DEMs) in combination with several  
 72 different observations at single locations (e.g., Scarpone et al., 2016). Different  
 73 geophysical techniques have provided a non-or minimally invasive approach to view  
 74 soil variations down to the saprolite and bedrock interface (e.g., Parsekian et al.,  
 75 2015). Whereas high frequency GPR has proven suitable for investigating soil  
 76 layering and thickness (e.g., Doolittle et al., 2007; Gerber et al., 2010; Roering et



77 al., 2010; Dal Bo et al., 2019), other methods such as ~~seismics~~ (e.g., Holbrook et  
 78 al., 2014), Electrical Resistivity Tomography (ERT, e.g., Braun et al., 2009), and low  
 79 frequency GPR (e.g., Aranha et al., 2002) are better suited to image ~~saprolite and~~  
 80 ~~bedrock interfaces~~ (e.g., Parsekian et al., 2015). GPR methods were previously also  
 81 used to indirectly measure ~~the distribution of~~ water flow (e.g., Zhang et al., 2014;  
 82 Guo et al., 2020) as well as root density (e.g., Hruska et al., 1999; Guo et al., 2013).  
 83 Interpreting the interplay of GPR signals with physical and chemical ~~soil~~ properties  
 84 ~~within the sub-surface~~ is challenging and **not well-understood** (e.g., Saarenketo,  
 85 1999; Sucre et al., 2011; Tosti et al., 2013; Sarkar et al., 2019).

86 The Chilean Coastal Cordillera (Fig. 1) contains an extreme climate and  
 87 vegetation gradient and ~~it~~ is a natural laboratory to study the influence of climate  
 88 and vegetation on ~~the sub-surface of the Earth~~ in a setting with a similar tectonic  
 89 history and lithology. The region is home to four study areas of the German-Chilean  
 90 EarthShape priority program (www.earthshape.net), where investigations of **biotic**  
 91 **interactions with critical zone processes are conducted** (e.g., Bernhard et al., 2018;  
 92 Oeser et al., 2018). The study areas were selected due to the arid climate in the  
 93 northernmost location (26° S), and temperate rain forest conditions in the  
 94 southernmost location (38° S). These four study areas are investigated to both  
 95 qualitatively and quantitatively describe the differences between the four settings.  
 96 Our previous work in these areas has so far identified increases in soil thickness  
 97 from north to south and major and trace element compositional variations within  
 98 pedons (e.g., Bernhard et al., 2018; Oeser et al., 2018; Dal Bo et al., 2019).  
 99 However, a detailed comparison of geophysical, geochemical, and soil observations  
 100 is yet to be conducted in these areas.

101 In this ~~study~~, we investigate how physical as well as chemical ~~observations~~  
 102 measured at point locations (pedons) relate to GPR observations to gain further  
 103 insight into ~~the~~ sub-surface variations. In general, we find that GPR signals can be  
 104 correlated to changes in ~~soil~~ physical properties if these changes are of sufficient  
 105 magnitude and laterally coherent. If such a correlation is observed, we discuss the  
 106 links between the physical and chemical properties. The comparison of physical and



chemical properties with field observations and GPR data helps to better understand the sub-surface at point locations (e.g., soil thickness) and in some cases allows for up-scaling point observations to the hillslope scale along a GPR measurement profile.

## 2 Study areas

Four primary study areas are investigated in the climatic and vegetation gradient observed in the Chilean Coastal Cordillera (Fig. 1 and 2; Table 2). From N to S, the four selected areas are: a) Pan de Azúcar (~26.1° S); b) Santa Gracia (~29.8° S); c) La Campana (~33.0° S); and d) Nahuelbuta (~37.8° S).

### 2.1 General climate, vegetation, and geologic setting

The Chilean Coastal Cordillera with its climate and vegetation gradient is a natural laboratory to study the influence of climate and vegetation on denudation (Fig. 1). From N to S (~26° to 38° S), present climate ranges from arid to humid-temperate. The mean annual precipitation increases from close to zero to ~1500 mm yr<sup>-1</sup>, and mean annual temperature decreases from ~20° C to ~5° C. The flora consists of small shrubs, geophytes and annual plants (Armesto et al., 1993) in the N and changes to lower-stature deciduous trees and shrubs intermix with tall evergreen mixed forest in the S. Vegetation cover increases from close to zero to ~100%.

Climate and vegetation in the primary study areas changed over time from the Last Glacial Maximum (LGM) to present. Mean annual precipitation during the LGM was higher than at present in all four study areas (Mutz et al., 2018). Mean annual temperature during the LGM was lower than at present except in the southernmost study area where mean annual temperature stayed the same (Mutz et al., 2018). Hence, the climate gradient observed today is comparable to the gradient during the LGM. Even though the climate was wetter and cooler during the LGM, no glaciers covered any of the study areas (Rabassa and Clapperton, 1990). Due to these



136 climatic changes over time, vegetation zones during the LGM were shifted  
137 northward by  $\sim 5^\circ$  and vegetation cover was slightly ( $\sim 5\text{-}10\%$ ) lower compared to  
138 present (Werner et al., 2018). This shift of vegetation zones to the N and the  
139 decrease in vegetation cover also likely influenced the fauna present, but to an  
140 unknown degree.

141 To compare the effect of climate and vegetation on soil thickness and GPR  
142 observations, differences in lithologies need to be minimal. However, these  
143 conditions are not always fulfilled and need to be taken in to account. Whereas  
144 bedrocks in Pan de Azúcar, La Campana, and Nahuelbuta are granites to  
145 granodiorites, the bedrocks in Santa Gracia range from Granodiorites to Gabbros  
146 (Oeser et al., 2018). Hence, the parent material in Santa Gracia is lower in the  $\text{SiO}_2$ -  
147 content ( $50\text{-}65\%$ ) in comparison to the other three study areas ( $\text{SiO}_2$ -content  $> 65\%$ ).  
148 Chemical weathering and physical erosion may be affected by this difference, which  
149 in turn influences soil formation and thickness.

150

## 151 2.2 Soil Characteristics

152 In each study area, depth profiles from a catena consisting of three profiles on  
153 the S-facing slope (top-slope, mid-slope, and toe-slope) and one profile on the N-  
154 facing slope (mid-slope) were described, sampled, and analyzed (Fig. 3; see also  
155 Bernhard et al., 2018; Oeser et al., 2018; Schaller et al., 2018; Dal Bo et al., 2019).

156 Previous soil studies from pedons in each area identify O, A, B, and C horizons  
157 (e.g., Bernhard et al., 2018) that overlie weathered bedrock (e.g., Oeser et al.,  
158 2018). In this study, we follow the approach of Riebe and Granger (2013) and refer  
159 to depth profiles as regolith profiles that are composed of a mobile soil layer that  
160 includes the A and B horizons, and an immobile saprolite layer represented by the  
161 C horizon.

162 In Pan de Azúcar, the soil is part of a regosol and consists of a 20 to 25 cm thick  
163 A and B horizon. The total organic carbon content is  $< 0.1\%$  (Bernhard et al., 2018).  
164 The observed angular fragments in the soil increase in size ( $> 1\text{ mm}$ ) with depth.  
165 The underlying saprolite is coarse-grained and jointed (Oeser et al., 2018). The



166 average bulk density of the soil layer is  $1.3 \text{ g cm}^{-3}$ . The ~~cambisol in Santa Gracia~~  
 167 ~~consists of~~ 30 to 55 cm thick layers of soil with A and B horizons overlying the  
 168 saprolite (Bernhard et al., 2018). The total organic carbon content is 0.4%. Whereas  
 169 the A horizon consists of a silt- to fine sand-sized matrix supporting up to 2 mm  
 170 sized fragments, the underlying B horizon shows a transitional increase of fragments  
 171 to a coarse fragment-supported fine-grained matrix (Oeser et al., 2018). The  
 172 average bulk density is  $1.5 \text{ g cm}^{-3}$ . The soils ~~and saprolites~~ in La Campana form a  
 173 cambisol. The soil layers consisting of A and B horizons are 35 to 60 cm thick and  
 174 have a total organic carbon content of 1.9% (Bernhard et al., 2018). The fine sand-  
 175 to silt-sized A horizon contains fragments of up to 3 mm. The matrix in the underlying  
 176 B horizon is coarsening downwards and the number of fragments increases such  
 177 that the horizon shifts from matrix- to clast-supported. The average bulk density is  
 178  $1.3 \text{ g cm}^{-3}$ . The ~~umbrisol in Nahuelbuta consists~~ of a 60 to 90 cm thick soil layer (A  
 179 and B horizons) and a readily disaggregating saprolite. The total organic carbon  
 180 content in these soils is 6.1% (Bernhard et al., 2018). The A horizon is composed of  
 181 silt-sized particles forming nodular soil aggregates. In the upper part there are up to  
 182 1 mm large quartz grains embedded whereas the lower part contains large  
 183 fragments. The fine sand-sized matrix of the transitional B horizon hosts subangular  
 184 fragments. The amount and size of these fragments increases with depth. The  
 185 average bulk density of the soil layer is  $0.8 \text{ g cm}^{-3}$ .

### 187 **3 Data compilation and methods**

188 New data from 32 GPR profiles in the four study areas were collected at  
 189 frequencies of 500 and 1000 MHz. These data are compared to physical and  
 190 chemical properties from point locations (pedons) from previous studies (Bernhard  
 191 et al., 2018; Oeser et al., 2018). These new GPR profiles complement previous GPR  
 192 data collected at the same frequencies in the same catchments (Dal Bo et al.,  
 193 2019). The difference between this study and that of Dal Bo et al. (2019) lies in the

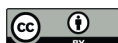

194 new, more extensive, GPR data coverage and the comparison of it to physical and  
195 chemical subsurface variations.

196 Using chemical and physical properties collected in pedons to understand the  
197 corresponding radar signatures is a difficult task requiring treatment on multiple  
198 layers. First, it would need fixed relationships translating the measured pedon  
199 properties to corresponding permittivity changes relevant for the radar signal.  
200 Second, it would need a radar forward model that successfully predicts the  
201 convolution of the emitted radar pulse with the sub-surface reflectivity. This includes  
202 among others handling constructive and destructive interference caused by closely-  
203 spaced permittivity changes in the vertical. For applications on soil, this is currently  
204 not possible because already the permittivity relationships are unclear. We  
205 therefore take a step back from the more sophisticated methods, and use simpler  
206 statistical metrics trying to isolate some properties (i.e. Pearson correlation) or  
207 combinations thereof (i.e. Principal Component Analysis) that may explain parts of  
208 the radar signatures.

209

### 210 3.1 Data compilation

211 In this study, GPR data are compared to previously published soil and saprolite  
212 physical and chemical properties (Table 1) such as: 1) soil bulk density, grain size  
213 distribution, pH, and cation exchange capacity - CEC (Bernhard et al., 2018); and  
214 2) Loss On Ignition - LOI, Chemical index of Alteration - CIA, mass transfer  
215 coefficient  $\tau$ , and volumetric strain,  $\epsilon_{\text{strain}}$  (Oeser et al., 2018). The grain size  
216 distributions provide a measure of the weight percent of different grain sizes smaller  
217 than 2 mm in the regolith, and the regolith bulk density provides a measure of how  
218 dense the soil and saprolite material is packed. The geochemical data used provide  
219 major and trace element analysis, the acid and base properties (pH) and cation  
220 exchange capacity (CEC). Major and trace element analysis allow the investigation  
221 of the loss on ignition (LOI), the chemical index of the mass transfer coefficient ( $\tau$ ),  
222 and the volumetric strain ( $\epsilon_{\text{strain}}$ ). LOI is a measure of the loss of volatile substances  
223 in a material due to excess heating (1000°C), thereby reflecting the amount of soil





organic matter. The degree of weathering can be quantified by the CIA which is sensitive to the removal of alkalis such as calcium, sodium, and potassium from feldspars (Nesbitt and Young, 1982). The mass transfer coefficient ( $\tau_{\text{strain}}$ ) reflects chemical gains and losses during weathering based on the elemental concentrations of mobile and immobile elements in weathered and unweathered material (e.g., Brimhall et al., 1985; Chadwick et al., 1990),  $\varepsilon$  in a regolith is based on the density  $\rho$  ( $\text{g cm}^{-3}$ ) and immobile element concentrations of the weathered regolith in comparison to the unweathered bedrock indicating volumetric gain or loss (Brimhall and Dietrich, 1987).

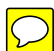

### 3.2 Ground Penetrating Radar (GPR)

Ground Penetrating Radar (GPR) is a geophysical technique based on the emission of pulsed electromagnetic waves into the subsurface and here frequencies of 500 and 1000 MHz are applied. The electromagnetic waves are reflected and scattered in the presence of dielectric contrasts at depth. The back-propagated reflected wave is then received at travel times, which depend on the depth-variable electromagnetic wave velocity  $v$ . The velocity of the media is dictated by the relative dielectric permittivity  $\varepsilon_r$  (Jol, 2009). The attenuation of the waves can be linked to the electrical conductivity  $\sigma$ . The vertical resolution depends on the system's bandwidth and the wave velocity and is in our case approximately 0.07 m for 500 MHz and 0.03 m for 1000 MHz. Surface GPR can be measured in two ways including: 1) Common-Offset Profiling (COP) and 2) Common-midpoint (CMP) or wide-angle-reflection-refractions (WARR) measurements (see also Dal Bo et al., 2019). COPs measure traveltimes versus spatial position along specific transects with two antennae at fixed offsets. Here, this was done along profiles crossing the pedons (e.g., Fig. 2 and 3). WARRs are used to retrieve velocity and physical properties at the point scale with variable antennae spacing. Specifically, for each pedon a WARR was measured in a relatively flat location by keeping the transmitter position fixed at the pedon location and by moving the receiver towards the transmitter with a step size varying between 0.01 and 0.05 m depending on the



254 deployed frequency. In such way, the move-outs of linear events (air wave and  
 255 ground wave) and of hyperbolic events (sub-surface reflections) could be identified  
 256 using the underlying assumption that internal reflectors are not dipping.

257 Twenty-eight COP transects going from hillslope toe (near valley) to top (ridge  
 258 crest) were collected in the four study areas using 500 and 1000 MHz GPR  
 259 antennae (Sensor and Software Inc.). The average trace spacing of these vary  
 260 between 0.01 and 0.05 m depending on frequency and location. These transects  
 261 were chosen in such a way as to run between pedons, where the previously  
 262 described physical and chemical properties were collected (Bernhard et al., 2018;  
 263 Oeser et al., 2018). Of these 28 profiles, two were collected in the Pan de Azúcar  
 264 study area, six in Santa Gracia, three in La Campana, and three in Nahuelbuta.  
 265 Each profile was measured twice to total 28 (at the two frequencies). The pedon  
 266 locations formed the basis for comparison to the GPR data as ground-truth data and  
 267 WARRs and COPs where collected specifically at these positions (red stars, Fig. 2).  
 268 Additionally, four perpendicular GPR crosslines (perpendicular to the transects)  
 269 were measured at both the 500 and 1000 MHz in the La Campana and Nahuelbuta  
 270 study areas. The position of each profile was determined using a differential GPS  
 271 (Leica Geosystems AG) with a maximum horizontal and vertical precisions of 2 and  
 272 4 cm, respectively.

273 GPR data were processed and analyzed similar to Dal Bo et al. (2019) using  
 274 MATLAB. The GPR data processing procedure included: frequency band-pass filter,  
 275 amplitude gain, background removal, and time-to-depth conversion (e.g., Jol, 2009).  
 276 The direct air wave between receiver and transmitter was muted. Similar to Dal Bo  
 277 et al. (2019), the newly measured WARR profiles at the pedon locations were  
 278 processed and analyzed using a combined linear move-out – hyperbolic move-out  
 279 approach. Ground wave and reflection velocities were picked, from which an  
 280 average value of GPR velocity per each study area was derived and used for the  
 281 time-to-depth conversion of the COP profiles (see Dal Bo et al., 2019). The  
 282 averaged value of GPR velocities is used to study soil depths on hillslope scale.  
 283 However, the use of an average will result in an over-/under-estimate of soil depths



284 on the hillslope scale. Signal envelopes were calculated using a Hilbert transform  
 285 (Green, 2004; Liu and Marfurt, 2007). At each pedon location, a certain number of  
 286 traces depending on the measurement step size (i.e. between 10 and 50) were  
 287 sampled for 0.5 m uphill and 0.5 m downhill the pedon and laterally averaged for  
 288 comparison to the pedon physical and chemical properties. The averaging assumes  
 289 that both chemical and GPR signatures do not change with depth across that  
 290 interval, an assumption that may not hold everywhere. As the GPR envelope is  
 291 directly related to the electric impedance (Telford et al., 1990; Jol, 2009), the  
 292 envelope onset and energy intervals could be compared to variations in physical,  
 293 and potentially chemical, soil properties.

294

### 295 3.3 Statistical Correlation and Principal Component Analysis

296 Comparison between the chemical and physical pedon information (Bernhard et  
 297 al., 2018; Oeser et al., 2018) and GPR data was conducted two different ways. First,  
 298 we carried out a correlation analysis using the Pearson' correlation coefficient ( $r$ ).  
 299 More specifically, we used the bulk density, clay content, LOI, CIA, Tau ( $\tau$ ),  
 300 volumetric strain ( $\epsilon_{\text{strain}}$ ), pH, and CEC for comparison to the GPR 500 and 1000  
 301 MHz antennae envelope data. The GPR envelopes were resampled and averaged,  
 302 such that the depth intervals were the same as for the derivatives of the soil data (see  
 303 Table S2). Furthermore, because the envelope of GPR data is sensitive to changes  
 304 along the vertical direction, we also calculated the vertical gradient of the ground  
 305 truth information at each sampled depth using a centered difference approximation.  
 306 Following this, the R package function `corrplot` (Wei, 2012) was used to calculate  
 307 the Pearson's correlation coefficient to identify correlations between the variables  
 308 (Sedgwick, 2012). This analysis was done considering the entire climate and  
 309 vegetation gradient and within each location. Both the original data and the  
 310 derivatives were used to explore which of the two approaches delivered meaningful  
 311 insights.

312 Second, we conducted a multivariate analysis of the data using a principal  
 313 component analysis (PCA; Wold et al., 1987). This was done for both the entire



climate gradient and within each study area using the factoextra R package (Kassambara, 2017). After each PCA analysis, a scree plot was evaluated to investigate how much variance was included in each principal component (PC, Bro and Smilde, 2014). In this study, at least 70% of the variance was among the first two PCs, which were then further analyzed. The contribution of each variable to the first and second PC was computed using the eigenvalues and eigenvectors from the covariance matrix (Abdi and Williams, 2010). This resulted in a plot where the x-axis is PC1 and the y-axis is PC2 and each variable is displayed as a vector with a specific direction and length that indicate the magnitude and direction of the contribution to each PC.

324

#### 325 **4 Results**

Physical and chemical properties from pedons are shown with the 500 and 1000 MHz GPR profiles and their envelopes with depth as well as investigated correlations and PCAs for the four study areas (Fig. 4 to 11 and supplement Figs S1 to S12; and supplement Tables S1A to D, S2A to D, S3, and S4A to E). For brevity, only the comparisons between pedon observations and GPR data are presented for the S-facing mid-slope positions in the main text (Fig. 4, 6, 8, and 10) and the remaining locations are provided in the supplementary material. Note that the envelopes are averaged over the COP data, collected over a lateral distance of 1 m in total, and are therefore not point information. Given that the soil thickness increases towards the southern study areas, the 1000 MHz GPR antennae is interpreted for the (northern two) Pan de Azúcar and Santa Gracia study areas, whereas in La Campana and Nahuelbuta the 500 MHz GPR signal was used because it has a deeper penetration depth. However, we show results below for both frequency antennas to demonstrate the difference in penetration depth and resolution between the two antennae. Details for each study area (from N to S) follow.

342



#### 343 4.1 Pan de Azúcar (northern most study area)

344 In Pan de Azúcar (Fig.1, 2A), a gradual transition from the B to the C horizon was  
 345 visually observed in the pedons at 20 to 40 cm whereas the **mobile/immobile**  
 346 boundary is considered to be at 20 to 25 cm (shaded gray areas and black line, Fig.  
 347 4, Fig. S1 to S3). The available physical properties for this location do not indicate  
 348 a strong change in material properties with depth. LOI and CIA indicate a minor  
 349 change in properties at ~20 cm depth. A maximum in the energy envelope in the  
 350 1000 MHz frequency is present at about 20 to 30 cm that could be related to the  
 351 transition of material properties between the B and C horizons and the location of  
 352 mobile/immobile boundary observed in the field.

353 Due to the sparse depth information for bulk density and clay content, the  
 354 statistical analyses for this location was not very insightful. Whereas clay content  
 355 shows a medium correlation (0.54) with the 1000 MHz GPR envelope, no strong  
 356 correlation between LOI, CIA,  $\tau$ , and the 1000 MHz GPR envelope could be found  
 357 (Table S3). In the PCA, three primary components (PC) explain over 80% of the  
 358 variance (Table S4A). PC1 has the bigger contribution from CIA, clay content, and  
 359 the 500 MHz envelope whereas PC2 has the bigger contribution from LOI, the  
 360 1000MHz envelope, and  $\tau$  of Na and Zr (Fig. 5).

361

#### 362 4.2 Santa Gracia

363 In Santa Gracia (Fig. 1, 2B), a gradual transition from the B to the C horizon was  
 364 observed in the field between 20 to 60 cm depth (shaded gray region Fig. 6, Fig. S4  
 365 to S6). The boundaries between the **mobile/immobile** layers in the pedon were  
 366 observed between 30 to 55 cm depth. Bulk density and volumetric strain show slight  
 367 changes around 15 and 30 cm depth. Whereas LOI and CIA do not show any  
 368 changes with depth,  $\tau$  shows changes between 30 and 50 cm depth. The 500 and  
 369 1000 MHz GPR profiles and envelopes show increased irregular and strong  
 370 reflections at ~25 cm (1000 MHz) and 45 cm (500 MHz) depth, and also maximums  
 371 in the envelope at ~25 cm (1000 MHz) and 45 cm (500 MHz) depths. These



372 variations in the reflections and maximums in the envelopes coincide with either the  
 373 top or central position of the transition from the B to the C horizon.

374 A weak to moderate correlation ( $\sim 0.3$ ) between clay content as well as CIA and  
 375 the 1000 MHz GPR envelope is present (Table S3). Results from a PCA analysis of  
 376 the Santa Gracia data indicate that 3 components explain over 80% of the observed  
 377 variance (Table S4B). PC1 explains over 35% of the variance, and includes bulk  
 378 density, CIA, and the 500 and 1000 MHz envelopes (Fig. 7). PC2, explaining 31%  
 379 of the variance, includes clay content, LOI, and  $\tau$  of Na and Zr.

380

#### 381 4.3 La Campana

382 Field observations from the La Campana area (Fig. 1, 2C) document a layer of  
 383 cobbles (5 to 10 cm diameter) between the A and B horizon at a depth of  $\sim 30$  cm  
 384 (Bernhard et al., 2018). The transition between the B to C horizons does not contain  
 385 rock fragments. The transition from the B to C horizon (shaded gray area, Fig. 8)  
 386 and the **mobile/immobile** boundary (black line, Fig. 8) are observed at 34 to 110 cm  
 387 and 35 to 60 cm, respectively (see also Fig. S7 to S9). The **mobile soil layer** extends  
 388 deeper in La Campana than in Pan de Azúcar or Santa Gracia and physical  
 389 properties were available for greater depths. Bulk density and grain size change  
 390 gradually with depth and no **soil thickness** could be determined. Also, LOI, CIA, and  
 391  $\tau$  do not show an abrupt change in regolith properties. Reflection hyperbolas and  
 392 irregular reflection horizons appear in the 500 and 1000 MHz GPR data at about 40  
 393 to 60 cm depth above the B to C horizon transition. The second peaks of the 500  
 394 and 1000 MHz GPR envelopes coincide with the B to C horizon transition.

395 In contrast to the previous study areas, the 500 MHz GPR envelope correlates  
 396 moderately with CIA (0.56), pH (-0.57), and CEC (-0.39, Table S3). Three  
 397 components from the PCA analysis explain about 80% of the total variance (Table  
 398 S4C). PC1 ( $\sim 35\%$  of the total variance) includes LOI,  $\tau$ , and CEC, whereas PC2  
 399 (31%) contains CIA, volumetric strain, and the envelopes (Fig. 9). PC3 is dominated  
 400 by pH as well as  $\tau$  of Zr. In general, whereas the first energy interval (1000 MHz)



could be attributed to the stone layer between the A and B horizon, the second energy interval occurs close to (<10 cm) with the mobile/immobile boundary (Fig. 8).

#### 4.4 Nahuelbuta (southernmost study area)

In Nahuelbuta, the B horizon contains pebbles and cobbles at around 60 to 80 cm depth (Bernhard et al., 2018). The B to C horizon transition appears at 50 to 100 cm depth (shaded gray region, Fig. 10; see also Fig. S10 to S12). The mobile/immobile boundary was identified at 60 to 90 cm depth. Density measurements in the pedon indicate a transition in bulk density between about 30 to 60 cm depth where also the grain size distribution changes. The LOI and  $\tau$  generally show large changes with depth, in contrast to the CIA and volumetric strain which are more homogenous with depth. The 500 MHz GPR profile indicate the existence of point targets/objects appearing as reflection hyperbola or undulating features at depths greater than 60cm. This depth is approximately the same depth at which the mobile/immobile boundary was identified, as well as changes in the physical (e.g. bulk density, percent sand) and chemical (LOI,  $\tau$ ) properties. The hyperbolas do not add up coherently during the lateral averaging and therefore do not produce a significant energy interval in the average envelope. The envelope is dominated by the energy intervals given by two reflections at about 30 to 50 cm depth. The lower set of these energy intervals could be linked with the upper physical soil boundary.

Results from the correlation analysis indicate the 500 MHZ GPR envelope is strongly positively correlated with bulk density (0.74), strongly inversely correlated with LOI (-0.6), and moderately inversely or positively correlated with clay content (-0.37), pH (0.46), and CEC (-0.53) (Table S3). Results from the PCA analysis show that two PC components explain ~75% of the variance. PC1 (~57 %) includes bulk density, clay content, LOI, and CEC, whereas PC2 (~18 %) contains  $\tau$  of Zr and pH (Fig. 11; Table S4D). In general, as the 500 MHz GPR envelope signal correlates



430 well with bulk density and clay content, the envelope signal reflects changes in soil  
431 properties.

432

## 433 **5 Discussion**

434 Here we evaluate the chemical, physical, and geophysical observations from the  
435 pedons. Using this information, we attempt to up-scale information from the pedons  
436 to the hillslopes scale along the GPR transects. Potential soil thickness over  
437 hillslopes is discussed in light of hillslope, aspect, and the climate and vegetation  
438 gradient from N to S.

439

### 440 **5.1 Synthesis of GPR data with physical and chemical properties from point** 441 **locations**

442  GPR data image changes in material properties that could be caused by  
443 changes in physical (e.g., bulk density, grain size variation, water content), or  
444 potentially chemical properties (e.g., pH, CEC, CIA). The interplay between these  
445 different properties can have a complicated influence on the GPR signal and  
446 therefore difficult to disentangle. Disentangling any relationship between GPR data  
447 and physical and chemical properties is further complicated as not all properties  
448 influencing GPR data are measured (e.g., water content,  pl, 2009). In addition, the  
449 determination of soil thickness (i.e., the boundary between the mobile/immobile  
450 layers) in the field causes its own problems as observed changes are transitional  
451 over a depth interval of 5 to 10 cm and not discrete. In the following, we start by  
452 discussing if GPR data can be used to image soil thickness as well as physical and  
453 chemical properties at the pedon locations where *in-situ* observations were made in  
454 each study area.

455 In Pan de Azúcar (Fig. 4, 5 and Fig. S1 to S3), the locations where GPR data  
456 can be compared to pedons shows low variability in the observed soil thickness (~20  
457 to 30 cm) at each pedon location. Whereas the 500 MHz signal shows deep (sub-  
458 soil depth) interfaces, the maximum in the 1000 MHz energy interval signal agrees





459 with the soil thicknesses observed in the field (Fig. 4 and Fig. S1 to S3). However,  
 460 the boundary between soil and saprolite layers is here probably too shallow to be  
 461 detected with the 1000 MHz antennae. An even higher frequency would be  
 462 favourable to detect the soil/saprolite boundary. Hence the Pearson correlations and  
 463 PCA results from Pan de Azúcar are restricted not only because of GPR analysis  
 464 but also due to restricted physical properties. The chemical and physical properties  
 465 correlate only weakly to moderately with the 1000 MHz envelopes (Table S3). The  
 466 PCA results indicate that soil bulk density is not likely correlated with either the 1000  
 467 MHz signal or LOI. In Pan de Azúcar, LOI does not represent soil organic matter as  
 468 soils of the arid zones have low or no organic matter content. The volatile loss  
 469 measured in the LOI is more likely associated with the combustion of carbonates.  
 470 In general, shallow soils in the arid zone do not show much variability in soil  
 471 thickness nor provide insight into the influence of physical or chemical properties on  
 472 GPR signals. 

473 In Santa Gracia (Fig. 6, 7 and Fig. S4 to S6), the field-observed soil thicknesses  
 474 of the different pedons are more variable than in Pan de Azúcar. Although the 500  
 475 MHz and 1000 MHz GPR envelopes indicate changes at depth, the physical and  
 476 chemical properties observed with depth show only a few distinct changes implying  
 477 that the soil thickness cannot easily be determined using only physical or chemical  
 478 properties. The PCA indicates that most of the variance in PC1 is explained by the  
 479 envelope signals, bulk density, and CIA whereas PC2 is dominated by clay content  
 480 and  $\tau$  of Na and Zr. The clay content does not seem to be a dominant factor for the  
 481 envelope signal, but rather represents a complex interaction between physical and  
 482 chemical property changes that cannot be disentangled with available data. It  
 483 appears that the second energy interval in the 1000 MHz envelope may agree with  
 484 the observed soil thickness in Santa Gracia, and (in contrast to the Pan de Azúcar  
 485 location) the first maximum in the 500 MHz envelope does agree with the observed  
 486 soil thickness. These observations again underscore that for different locations with  
 487 variable soil type, vegetation, and physical and chemical properties local calibration  
 488 between pedons and GPR data are required. 



489 The determination of soil thickness from GPR data in La Campana is as difficult  
 490 as in the previous settings (Fig. 8, 9 and Fig. S7 to S9). The field observations  
 491 indicate relatively large transition zones for the B to the C horizon, and some  
 492 physical properties vary only weakly with depth. As a result, the determination of  
 493 soil thickness with physical and chemical properties is difficult, despite the moderate  
 494 to strong correlation of 500 MHz GPR envelopes with derivatives of physical and  
 495 chemical properties. Whereas the variance in PC1 is explained by bulk density, LOI,  
 496  $\tau$  of Na and Zr, and volumetric strain, the variance in PC2 is dominated by the  
 497 envelopes, CIA, pH, and CEC. Chemical properties seem to have a considerable  
 498 influence on GPR signals in this setting. In La Campana, the first energy interval of  
 499 the 500 MHz envelope is interpreted to reflect the previously described stone layer  
 500 whereas the second energy interval seems to match the observed soil thickness.  
 501 Given these uncertainties in local conditions, a clear identification of soil thickness  
 502 from GPR data is difficult, even with local calibration to a pedon.

503 Finally, in Nahuelbuta (Fig. 10, 11 and Fig. S10 to S12), the observed soil  
 504 thickness in the field is the deepest of all the four study areas and reaches from 50  
 505 to 100 cm. The soil thickness is easily identifiable based on physical properties. The  
 506 derivatives of the physical properties correlate moderately with the available 500  
 507 MHz envelope (Table 3). Furthermore, the chemical properties correlate weakly with  
 508 the GPR envelopes. The variance is strongly explained by PC1 containing physical  
 509 properties (e.g., bulk density, clay content, LOI) and less by PC2 including chemical  
 510 properties (e.g., pH,  $\tau$  of Na and Zr). Even so changes in properties are more  
 511 pronounced in Nahuelbuta than in the drier locations, a clear correlation between  
 512 maximums in the 500 MHz energy envelope and soil thickness is not present. The  
 513 second energy interval of the 500 MHz envelope best agrees with the observed soil  
 514 thickness. However, due to local inhomogeneities caused by intense vegetation,  
 515 every pedon and its attributed GPR envelope look different.

516 In summary, the 500 and 1000 MHz envelopes at point locations have the  
 517 potential to be used to determine soil thickness. But, the clarity with which this can  
 518 be done is variable and requires calibration to local pedons. Even with local



519 calibration, the relationships are not always clear (e.g., Fig. 8). Physical and  
520 chemical properties with depth exert a complex interplay on measured GPR signals.  
521 If a certain combination of physical and chemical properties is dominant in one  
522 setting, another combination may influence the measured GPR signal. Therefore,  
523 what GPR frequency works best for the individual study area due to different  
524 physical and chemical properties needs to be investigated with information from  
525 point locations/pedons. For the arid Pan de Azúcar and semi-arid Santa Gracia we  
526 suggest using the 1000 MHz frequency (or higher), whereas for the Mediterranean  
527 climate setting of La Campana and temperate Nahuelbuta the 500 MHz frequency  
528 proved better. Improvements in our approach to determine soil thickness from GPR  
529 data might be possible by applying multifrequency GPR techniques, which are freed  
530 from antenna effects by fusion of different frequency measurements (e.g., De Coster  
531 and Lambot, 2018). Nevertheless, the point information of soil thickness has the  
532 potential to be up-scaled to hillslopes in some settings using GPR transects after  
533 local calibration is conducted.

534

## 535 **5.2 Up-scaling to hillslopes**

536 Here we use insights gained from comparisons between GPR and point  
537 locations to extrapolate the soil thickness along the hillslope GPR profiles (Fig. 2,  
538 3). The up-scaling is carried out using a combination of amplitude and envelope  
539 depth-converted profiles. To do this up-scaling, we calculated the envelope along  
540 each profile. Then, using the known soil depth data from all pedons in one study  
541 area, this interface was estimated along the profiles by searching for the  
542 corresponding signal in the envelope at every meter. Even though the information  
543 of three-point locations is at the lower limit, the combination of field observations  
544 with GPR transects allows estimation of the lateral variability of soil thickness over  
545 hillslopes. However, given the complications mentioned in section 5.1 (e.g., which  
546 frequency GPR antenna and envelope interval to use) the up-scaling and the  
547 indicated soil thickness need to be treated with care. 



548 In Pan de Azúcar (Fig. 12; Supplementary Fig. S14) the observed B to C horizon  
 549 transition at point locations is typically between ~14 to 50 cm. No clear soil thickness  
 550 could be determined based on GPR profiles. Nevertheless, soil thicknesses  
 551 identified from 1000 MHz GPR envelopes seem to be relatively homogeneous over  
 552 the entire S-facing transect with an average value of  $25 \pm 3$  cm (Table 2). In contrast,  
 553 the N-facing transect indicates a thinner soil uphill than downhill where it reaches a  
 554 maximum depth of ~50 cm (Fig. S14).

555 In Santa Gracia (Fig. 13; Supplementary Fig. S15 to 17), the soil thicknesses  
 556 from point locations/pedons in the S-facing transect increases downslope and  
 557 ranges between 20 to 60 cm (Table 2). The soil thickness based on the 1000 MHz  
 558 GPR envelope at the top-slope position (SGPED20) decreases first downhill and  
 559 then increases again, thereby demonstrating laterally variability **along** the hillslope.  
 560 The soil thickness in the mid-slope position (SGPED40) is variable and reaches  
 561 from 25 to 50 cm. At the toe-slope position (SGPED60) a mostly constant thickness  
 562 of 30 cm is identified. In the N-facing transect almost no variability in soil thickness  
 563 (~25 cm) is observed. Even so the soil thickness based on GPR envelopes cannot  
 564 be used to decipher the exact soil thickness, the method still offers a close  
 565 approximation of soil thicknesses determined by field observations and GPR  
 566 profiles.

567 In La Campana (Fig. 14; Supplementary Fig. S18 to 20) the soil thickness from  
 568 the 500 MHz GPR envelope is 35 to 70 cm. Whereas the top- and mid-slope  
 569 positions in the S-facing hillslope (LCPED10 and LCPED20, respectively) show  
 570 variable soil thickness between 50 and 70 cm, the toe-slope position (LCPED30)  
 571 contains soil thicknesses between 35 and 70 cm. Relatively constant soil thickness  
 572 of 50 to 60 cm are identified for the N-facing mid-slope position (LCPED40). Field  
 573 observations do not always agree with soil thicknesses based on GPR envelopes.  
 574 In the La Campana location, soil thicknesses based on GPR envelopes need to be  
 575 considered with caution, but contain valuable information such as the existence of  
 576 pebble layers. However, GPR profiles show hyperbolas and continuous reflections,  
 577 which can be interpreted along almost all the covered length. These interfaces can



578 be reliably used to infer soil thicknesses, when a previous calibration with soil  
 579 pedons has been done.

580 In Nahuelbuta (Fig. 15; Supplementary Fig. S21 to 23), soil thickness in the S-  
 581 facing top-slope position (NAPED10) increase downhill from 60 to 110 cm. At the  
 582 mid-slope position (NAPED20), the soil thickness is highly variable and ranges from  
 583 50 to 110 cm. Soil thickness at the toe-slope position (NAPED30) is 80 to 110 cm.  
 584 In the N-facing mid-slope position the soil thickness ranges from 60 to 110 cm. Soil  
 585 thicknesses based on GPR envelopes are generally thicker than soil thicknesses  
 586 observed in the field and ~~do also~~ not agree well with thicknesses based on GPR  
 587 profiles. The application of GPR envelopes to determine soil thicknesses needs to  
 588 be treated with care in this setting. On the contrary, GPR profiles display rather  
 589 continuous reflections that might represent interfaces within the soil, and could  
 590 therefore be used to extrapolate point-scale ground-truth information over the profile  
 591 scale.

592

### 593 **5.3 Changes of soil thickness with hillslope position, aspect, and latitude**

594 The soil thickness imaged with GPR envelopes over hillslope transects reflect  
 595 mainly physical properties, but also chemical properties (e.g., CIA,  $\tau$ ). This approach  
 596 gives the opportunity to study non-invasively possible changes in soil thickness over  
 597 hillslope position, aspect, and latitude (Fig. 12 to 15; Fig. S14 to S24; Table 2). Here  
 598 we summarize any regional trends in soil thickness between the four study areas  
 599 and different aspect (N- vs. S-facing) hillslopes (Fig. 2).

600 Soil thickness in ~~a catena~~ that develop under comparable climate and on similar  
 601 lithologies are expected to increase downhill (e.g., Birkeland, 1999). From the top-  
 602 to toe-slope position along a catena the potential for physical erosion decreases  
 603 downslope due to decreasing physical potential whereas the potential for deposition  
 604 increases. In Pan de Azúcar, the soil thickness based on the GPR envelopes in the  
 605 S-facing hillslope are constant, whereas the N-facing hillslope indicates soil  
 606 thickness increasing from top- to toe-slope. The possible slight increase in soil  
 607 thickness from top- to toe-slope can be explained by low denudation rates due to



608 very low precipitation rates in Pan de Azúcar. In Santa Gracia, the constantly thin  
 609 soils at the S-facing top-slope are in contrast to the thicker and more variable soil  
 610 thickness in the mid-slope position. Bernhard et al., (2018) describe an increase of  
 611 the A to BC horizon from top- to toe-slope in the S-facing hillslope. In Santa Gracia,  
 612 precipitation and minor vegetation cover may cause the increase of the soil  
 613 thickness downslope as well as the variable soil thickness in the mid-slope position.  
 614 In La Campana, the soil thickness based on GPR envelopes is highly variable.  
 615 Bernhard et al., (2018) observed the thickest soil also in the mid-slope position,  
 616 describe a disturbed hillslope with recent erosion events (e.g., possibly due to a past  
 617 fire and temporary mobilization of sediment). Therefore, the S-facing hillslope in La  
 618 Campana is a disturbed system and therefore difficult to laterally extrapolate  
 619 horizons. Due to the differences in soil thickness information from the different  
 620 methods, soil thickness changes in hillslopes from Nahuelbuta are not further  
 621 considered.

622 In the southern hemisphere the N-facing hillslope is expected to be slightly  
 623 warmer (higher solar irradiation) and drier (due to higher evaporation) than the S-  
 624 facing hillslope (e.g., Anderson et al., 2013). These differences in available soil  
 625 moisture could potentially lead to different vegetation and soil thickness. In Pan de  
 626 Azúcar, the soil thickness of the S- and N-facing mid-slope positions cannot be  
 627 attributed to differences in vegetation cover because it is absent from both the N-  
 628 and S-facing slopes. In Santa Gracia, however, the thicker soil in the S-facing mid-  
 629 slope position than in N-facing position can either be attributed to higher vegetation  
 630 cover in the S-facing position (e.g., Riebe et al., 2017) or subtle lithological changes  
 631 (e.g. Oeser et al., 2018). Different vegetation on S-facing and N-facing slope  
 632 positions in La Campana could explain the higher variability in soil thickness in the  
 633 S-facing mid-slope positions (35 to 70 cm) than the N-facing hillslope (50 to 60 cm).  
 634 However, the aspect-related differences in La Campana may represent local  
 635 heterogeneities (e.g., physical erosion) rather than a hillslope aspect-related trend  
 636 (Bernhard et al., 2018). Finally, in Nahuelbuta, the GPR envelopes indicate highly  
 637 variable, but also slightly thicker soil thickness in the S-facing than the N-facing



638 hillslopes. A higher clay content in the S-facing than the N-facing hillslope is  
 639 attributed to a more intense soil formation in the S-facing hillslope (Bernhard et al.,  
 640 2018). Differences in soil thickness on S- and N-facing hillslopes are increasing from  
 641 N to S in latitude due to the increasing difference of solar irradiation on evaporation,  
 642 vegetation, and possible frost cracking (e.g., Riebe et al., 2017).

643 Not only is there a change in soil thickness due to aspect, but also due to the  
 644 latitude. Soil thickness increases and is more variable from N to S in latitude due to  
 645 different climate and biota in each study area. Increasing precipitation rates from N  
 646 to S allow an increase and diversity in vegetation. From N to S in latitude, soils  
 647 increase in thickness and are more variable in thickness due to the influence of biota  
 648 (e.g., trees, burrowing animals). The increase in biota not only causes variable soil  
 649 thickness, but also homogenizes soils by bioturbation (e.g., Schaller et al., 2018). In  
 650 addition, the increase in vegetation under increasing precipitation rates causes  
 651 stabilization of hillslopes due to increasing precipitation rates (e.g., Langbein and  
 652 Schumm, 1958; Starke et al., 2020). Hillslope denudation rates derived from *in situ*-  
 653 produced cosmogenic nuclides increase from Pan de Azúcar to La Campana and  
 654 slightly decrease for Nahuelbuta (Schaller et al., 2018; Oeser et al., 2018).  
 655 Increasing soil thickness generally diminishes soil production rates (e.g., Heimsath  
 656 et al., 1997) which under steady-state conditions equal hillslope denudation rates.

657

## 658 **6 Conclusions**

659 Soil thickness and properties are investigated in four study areas along a climate  
 660 and vegetation gradient. The visually observed transition from mobile soil to  
 661 immobile saprolite coincides with one or more changes in measured physical and  
 662 chemical properties in each study area. These physical and chemical properties in  
 663 turn, influence return-signals generated by Ground Penetrating Radar (GPR) in the  
 664 sub-surface, but no systematic trend is visible for which physical or chemical  
 665 properties correlate with GPR based observations of soil thickness. Even this, the  
 666 measurements and interpretation of GPR signals for systematically identifying



667 subsurface changes in physical and chemical properties is not straightforward and  
668 differs for each study area. In general, the better developed the soil the better the  
669 correlation of GPR signals from point locations with physical and chemical soil  
670 properties. We note that what frequency GPR antenna is best suited for identifying  
671 soil thickness is difficult, and calibration to local point locations (e.g. pedons) is  
672 always required. However, after local calibration between GPR signals and point  
673 locations is conducted, information of soil thickness from point locations can be up-  
674 scaled to hillslope transects with car 

#### 676 **Acknowledgement**

677 We would like to thank CONAF and all the Park Rangers for the possibility of working  
678 in the natural parks, for providing access to the sample locations, and help inside  
679 the National Parks. We acknowledge support from the German Science Foundation  
680 (DFG) priority research program SPP-1803 “EarthShape: Earth Surface Shaping by  
681 Biota” (sub grants KR 3725/1-1 and SCHA 1690/3-1). RD was supported by a DFG  
682 Emmy Noether grant (DR 822/3-1).

683

684

685

686





687 **References:**

- 688 Abdi, H., and Williams, L.J. Principal component analysis, Wiley interdisciplinary  
 689 reviews: computational statistics 2, 433-459, 2010.
- 690 Anderson, S.P., Anderson, S.P., and Tucker, G.E. Rock damage and regolith  
 691 transport by frost: An example of climate modulation of the geomorphology of  
 692 the critical zone, Earth Surface Processes and Landforms, DOI:  
 693 10.1002/esp.3330, 2013.
- 694 Aranha, P.R.A., Augustin, C.H.R.R., and Sobreira, F.G. The use of GPR for  
 695 characterizing underground weathered profiles in the sub-humid tropics, Journal  
 696 of Applied Geophysics, 49, 195-210, 2002.
- 697 Armesto, J.J., Vidiella, P.E., and Gutierrez, J.R. Plant communities of the fog-free  
 698 coastal desert of Chile: plant strategies in a fluctuating environment, Revista  
 699 Chilena de Historia Natural, 66, 271-282, 1993.
- 700 Bernhard, N., Moskwa, L.-M., Oeser, R., von Blanckenburg, F., Boy, H., Brucker,  
 701 E., Dippold, M., Ehlers, T.A., Fuentes-Espoz J.P., Godoy, R., Köster, M., Osses,  
 702 P., Paulino, L., Schaller, M., Scholten, T., Seguel, O., Spielvogel, S., Spohn, M.,  
 703 Stock, S., Stroncik, N., Uebernickel, K., Wagner, D., Kühn, P.: Pedogenic and  
 704 microbial interrelations to regional climate and local topography: New insights  
 705 from a climate gradient (arid to humid) along the Coastal Cordillera of Chile,  
 706 Catena, 170, 335-355, 2018.
- 707 Birkeland, P.W. Soils and Geomorphology, Oxford University Press, New York,  
 708 1999.
- 709 Braun, J.-J., Descloitres, M., Riotte, J., Fleury, S., Barbiero, L., Boeglin, J.-L.,  
 710 Violette, A., Lacarce, E., Ruiz, L., Sekhar, M., Mohan Kumar, M.S.,  
 711 Subramanian, S., and Dupre, B. Regolith mass balance inferred from combined  
 712 mineralogical, geochemical and geophysical studies: Mule Hole gneissic  
 713 watershed, South India, Geochimica et Cosmochimica Acta, 73, 935-961, 2009.
- 714 Brimhall, G.H., and Dietrich, W.E. Constitutive mass balance relations between  
 715 chemical composition, volume, density, porosity, and strain in metasomatic



- 716 hydrochemical systems: Results on weathering and pedogenesis, *Geochimica*  
 717 *et Cosmochimica Acta*, 51 (3), 567-587, 1987.
- 718 Brimhall, G.H., Alpers, C., and Cunningham, A.B. Analysis of supergene ore-forming  
 719 processes using mass balance principles, *Economic Geology*, 80, 1227-1254,  
 720 1985.
- 721 Bro, R., and Smilde, A.K. Principal component analysis, *Analytical Methods*, 6,  
 722 2812-2831, 2014.
- 723 Chadwick, O.A., Brimhall, G.H., and Hendricks, D.M. From a black to a gray box - a  
 724 mass balance interpretation of pedogenesis, *Geomorphology*, 3, 369-390,  
 725 1990.
- 726 Dal Bo, I., Klotzsche, A., Schaller, M., Ehlers, A.T., Kaufmann, M.S., Fuentes-  
 727 Espoz, J.P., Vereecken, H., van der Kruk, J. Geophysical imaging of regolith in  
 728 landscapes along a climate and vegetation gradient in the Chilean Coastal  
 729 Cordillera, *Catena*, 180, 146-159, 2019.
- 730 De Coster, A., and Lambot, S. Fusion of Multifrequency GPR Data Freed From  
 731 Antenna Effects, *Journal of Selected Topics in Applied Earth Observations and*  
 732 *Remote Sensing*, 11 (2), 664-674, 2018.
- 733 Doolittle, J.A., and Collins, M.E. Use of soil information to determine application of  
 734 ground penetrating radar. *Journal of Applied Geophysics*, 33 (1-3), 101-105,  
 735 1995.
- 736 Doolittle, J.A., Minzenmayer, F.E., Waltman, F.W., Benham, E.C., Tuttle, J.W., and  
 737 Peaslee, S.D. Ground-penetrating radar soil suitability map of the conterminous  
 738 United States, *Geoderma*, 141, 416-421, 2007.
- 739 Gerber, R., Felix-Henningsen, P., Behrens, T., and Scholten, T. Applicability of  
 740 ground-penetrating radar as a tool for nondestructive soil-depth mapping on  
 741 Pleistocene slope deposits, *Journal of Plant Nutrition and Soil Science*, 173 (2),  
 742 173-184, 2010.
- 743 Green, A.G. Applications of 3-D georadar methods to diverse environmental and  
 744 engineering problems, *Progress in Environmental and Engineering Geophysics*,  
 745 edited by Chao, C. and Jianghai, X., Science Press USA, 220-226, 2004.



- 746 Guo, L., Chen, J., Cui, X., Fan, B., and Lin, H. Application of ground penetrating  
 747 radar for coarse root detection and quantification: a review, *Plant Soil*, 362, 1-  
 748 23, 2013.
- 749 Guo, L., Mount, G.J, Hudson, S., Lin, H., and Levia, D. Pairing geophysical  
 750 techniques helps understanding of the near-surface Critical Zone: Visualization  
 751 of preferential routing of stemflow along coarse roots. *Geoderma*, 357, 113953,  
 752 2020.
- 753 Heimsath, A.M., Dietrich, W.E., Nishiizumi, K., and Finkel, R.C. The soil  
 754 productionfunction and landscape equilibrium, *Nature*, 388, 358-361, 1997.
- 755 Heimsath, A.M., Dietrich, W.E., Nishiizumi, K., and Finkel, R.C. Cosmogenic  
 756 nuclides, topography, and the spatial variation of soil depth, *Geomorphology*,  
 757 27, 151-172, 1999.
- 758 Hilgard, E.W. *Soils: Their Formation, Properties, Compositions and Relations to*  
 759 *Climate and Plant Growth in the Humid and Arid Regions*, The Macmillan  
 760 Company, New York, 1914.
- 761 Holbrook, W.S., Riebe, C.S., Elwaseif, M., Hayes, J.L., Vasler-Reeder, K., Harry,  
 762 D.L., Malazian, A., Dosseto, A., Hartsough, P.C., and Hopmans, W.  
 763 Geophysical constraints on deep weathering and water storage potential in the  
 764 Southern Sierra Critical Zone Observatory. *Earth Surface Processes and*  
 765 *Landforms*, 39, 366-380, 2014.
- 766 Hruska, J., Cermak, J., and Sustek, S. Mapping tree root system with ground-  
 767 penetrating radar. *Tree Physiology*, 19, 125-130, 1999.
- 768 Jenny, H. *Factors of Soil Formation: A System of Quantitative Pedology*, Dover  
 769 Publications, New York, 1994.
- 770 Jol, H.M. (Ed.): *Ground penetrating radar: theory and applications*, Elsevier Science,  
 771 Amsterdam, the Netherlands ; Oxford, United Kingdom, 2009.
- 772 Kassambara, A. *Practical guide to cluster analysis in R: unsupervised machine*  
 773 *learning*, STHDA, 2017.
- 774 Langbein, W.B., and Schumm, S.A. Yield of sediment in relation to mean annual  
 775 precipitation, *Transaction American Geophysical Union*, 39, 1076-1084, 1958.

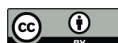

- 776 Liu, J.L., and Marfurt, K.J. Instantaneous Spectral Attributes to Detect Channels,  
 777 Geophysics, 72, 23-31.  
 778 <http://dx.doi.org/10.1190/1.2428268>, 2007.
- 779 Mellett, J.S. Ground penetrating radar applications in [engineering](#), environmental  
 780 management, and geology, Journal of Applied Geophysics, 33 (1-3), 157-166,  
 781 1995.
- 782 Miller, T.W., Hendrickx, J.M.H., and Borchers, B. Radar detection of [buried](#)  
 783 landmines field soils. Vadose Zone Journal, 3 (4). 1116-1127, 2002.
- 784 Mutz, S.G., Ehlers, T.A., Werner, M., Lehmann, G., Stepanek, C., and Li, J. Where  
 785 is Late Cenozoic climate change most likely to impact denudation?, Earth  
 786 Surface Dynamics, 6, 271-301, <https://doi.org/10.5194/esurf-2017-47>, 2018.
- 787 Oeser, R.A., Stroncik, N., Moskwa, L.-M., Bernhard, N., Schaller, M., Canessa, R.,  
 788 van der B Rijn, L., Köster, M., Brucker, E., Stock, S.S., Fuentes, J.P., Godoy, R.,  
 789 Matus, F.J., Oses Pedraza, R., Osses McIntyre, P., Paulino, L., Seguel, O.,  
 790 Bader, M.Y., Boy, J., Dippold, M.A., Ehlers, T.a., Kühn, P., Kuzyakov, Y.,  
 791 Peinweber, P., Scholten, T., Spielvogel, S., Spohn, M., Übernickel, K.,  
 792 Tielbörger, K., Wagner, D., and von Blanckenburg, F. Chemistry and  
 793 microbiology of the Critical Zone along a steep climate and vegetation gradient  
 794 in the Chilean Coastal Cordillera, Ctena, 170, 183-203, 2018.
- 795 Parsekian, A.D., Singha, K., Minsley, B.J., Holbrook, W.S., and Slater, L. Multiscale  
 796 geophysical imaging of the critical zone, Reviews of Geophysics, 53, 1-26,  
 797 2015.
- 798 Porder, S., Vitousek, M.P., Chadwick, O.A., Chamberlain, C. P. and Hilley, G.E.  
 799 Uplift, Erosion, and Phosphorous Limitation in Terrestrial Ecosystems,  
 800 Ecosystems, 10, 158-170, 2007.
- 801 Rabassa, J., and Clapperton, C.M. Quaternary glaciations of the southern Andes,  
 802 Quaternary Science Reviews, 9, 153-174, 1990.
- 803 Riebe, C.S., and Granger, D. Quantifying deep and near-surface chemical erosion  
 804 on cosmogenic nuclides in soils, saprolite, and sediment, Earth Surface  
 805 Processes and Landforms, 38, 523-533, 2013.



- 806 Riebe, C.S., Hahm, W.J. and Brantley, S.L. Controls on deep critical zone  
 807 architecture: a historical review and four testable hypothesis, *Earth Surface*  
 808 *Processes and Landforms*, 42, 128-156, 2017.
- 809 Roering, J.J., Kirchner, J.W., and Dietrich, W.E. Hillslope evolution by nonlinear,  
 810 slope-dependent transport: Steady state morphology and equilibrium  
 811 adjustment timescales, *Journal of Geophysical Research*, 106, B8, 16499-  
 812 16513. 2001.
- 813 Roering, J.J., Marshall, J., Booth, A.M., Mort, M., and Jin, Q. Evidence for biotic  
 814 controls on topography and soil production, *Earth and Planetary Science*  
 815 *Letters*, 289, 183-190, 2010.
- 816 Saarenketo, T. Electrical properties of water in clay and silty soils. *Journal of Applied*  
 817 *Geophysics*, 40, 73-88, 1998.
- 818 Sarkar, R., Paul, K.B., and Higgins, T.R. Impacts of soil physiochemical properties  
 819 and temporal-seasonal soil-environmental status on ground-penetrating radar  
 820 response. *Soil Science Society of America Journal*, 83, 542-554, 2019.
- 821 Scarpone, C., Schmidt, M.G., Bulmer, C.E., and Knudby, A. Modelling soil thickness  
 822 in the critical zone for Southern British Columbia, *Geoderma*, 282, 59–69, 2016.
- 823 Schaller, M., Ehlers, T., Lang, K., Schmid, M., and Fuentes-Espoz, J. Addressing  
 824 the contribution of climate and vegetation cover on hillslope denudation, Chilean  
 825 Coastal Cordillera (26°–38° S), *Earth and Planetary Science Letters*, 489, 111-  
 826 122, 2018.
- 827 Sedgwick, P. Pearson's correlation coefficient, *BMJ*, 345:e4483, 2012.
- 828 Starke, J., Ehlers, T.A., and Schaller, M. Latitudinal effect of vegetation on erosion  
 829 rates identified along western South America. *Science*, 367, 1358-1361, 2020.
- 830 Sucre, E.B., Tuttle, J.W., and Fox, T.R. The use of ground-penetrating radar to  
 831 accurately estimate soil depth in rocky forest soils. *Forest Science* 57 (1), 59-  
 832 66, 2011.
- 833 Telford, W.M., Geldart, L.P., Sheriff, R.E. and Keys, D.A. (Eds.): *Applied*  
 834 *Geophysics*, 2th Edition, Cambridge University Press, Cambridge, 770.  
 835 <http://dx.doi.org/10.1017/CBO9781139167932>, 1990.



836 Tosti, F., Patriarca, C., Slob, E., Benedetto, A., and Lambot, S. Clay content  
 837 evaluation in soils through GPR signal processing. *Journal of Applied*  
 838 *Geophysics*, 97, 69-80, 2013.

839 Wei, T. Package 'corrplot'-Visualization of a correlation matrix. v0.60. cran. rproject.  
 840 org, 2012.

841 Werner, C., Schmid, M., Ehlers, T.A., Fuentes-Espoz, J.P., Steinkamp, J., Forrest,  
 842 M., Liakka, J., Maldonado, A., and Hickler, T. Effect of changing vegetation and  
 843 precipitation on denudation - Part1; Predicted vegetation composition and cover  
 844 over the last 21 thousand years along the Coastal Cordillera of Chile, *Earth*  
 845 *Surface Dynamics*, 6, 829-858, <https://doi.org/10.5194/esurf-6-829-2018>, 2018.

846 Wold, S., Esbensen, K., and Geladi, P. Principal component analysis,  
 847 *Chemometrics and intelligent laboratory systems*, 2, 37-52, 1987.

848 Zhang, J., Lin, H., and Doolittle, J. Soil layering and preferential flow impacts on  
 849 seasonal changes of GPR signals in two contrasting soils. *geoderma*, 213,  
 850 560-569, 2014.

851  
 852  
 853

#### 854 **Figure captions**

855 Fig. 1:  
 856 Digital elevation model (Data source: GTOPO30) for the Chilean Coastal Cordillera  
 857 and the Central Andes showing the four investigated study areas (from N to S): Pan  
 858 de Azúcar (~26° S); Santa Gracia (~30° S); La Campana (~33° S); and Nahuelbuta  
 859 (~38° S).

860

861 Fig. 2:  
 862 Satellite images (Data source: Google Earth©) of the four study areas from N to S  
 863 in latitude: A) Pan de Azúcar; B) Santa Gracia; C) La Campana; and D) Nahuelbuta.  
 864 Red stars indicate the pedon positions whereas the blue lines represent the  
 865 locations of the geophysical investigations.



866

867 Fig. 3:

868 N- and S-facing hillslopes of the four study areas with locations of soil pedons and  
 869 transects of ground penetrating radar indicated by the red double arrows.

870

871 Fig. 4:

872 Compilation of physical and chemical investigations with depth at the pedon location  
 873 in the mid-slope position of the S-facing hillslope in Pan de Azúcar. Properties  
 874 shown are: 1) GPR transect and the envelope profile of the 500 MHz measurement;  
 875 2) GPR transect and the envelope profile of the 1000 MHz measurement; 3) Bulk  
 876 density; 4) Grain size distribution of sand, silt, and clay; 5) Loss on ignition LOI; 6)  
 877 Chemical index of alteration CIA 7) Chemical index of the mass transfer coefficient  
 878  $\tau$ ; and 8) volumetric strain  $\epsilon_{\text{strain}}$ . The black line indicates the boundary between  
 879 the mobile soil and the immobile saprolite (after Oeser et al., 2018) and the gray  
 880 area with green lines reflects the transition zone from B to C horizon (after Bernhard  
 881 et al., 2018).

882

883 Fig. 5:

884 Primary component analysis PCA of properties for all four soil pedons in Pan de  
 885 Azúcar. A) Scree plot showing the percentage of explained variances and B)  
 886 Variables - PCA.

887

888 Fig. 6:

889 Compilation of physical and chemical investigations at the pedon location in the mid-  
 890 slope position of the S-facing hillslope in Santa Gracia. Properties shown are listed  
 891 in caption of Fig. 4.

892

893 Fig. 7:

894 Primary component analysis PCA of properties for all four soil pedons in Santa  
 895 Gracia.



896

897 Fig. 8:

898 Compilation of physical and chemical investigations at the pedon location in the mid-  
 899 slope position of the S-facing hillslope in La Campana. Properties shown are listed  
 900 in in caption of Fig. 4.

901

902 Fig. 9:

903 Primary component analysis PCA of properties for all four soil pedons in La  
 904 Campana.

905

906 Fig. 10

907 Compilation of physical and chemical investigations at the pedon location in the mid-  
 908 slope position of the S-facing hillslope in Nahuelbuta. Properties shown are listed  
 909 as in caption of Fig. 4. Note that only the 500 MHz signal and envelope profile exist.

910

911 Fig. 11:

912 Primary component analysis PCA of properties for all four soil pedons in  
 913 Nahuelbuta.

914

915 Fig. 12:

916 A) 1000 MHz GPR transect and B) envelope for the S-facing hillslope in Pan de  
 917 Azúcar. The hillslope transect spans over ~20 m and includes pedon AZPED60,  
 918 AZPED50, and AZPED40 (black boxes). The potential soil thickness based on the  
 919 envelopes is indicated by stars (in B). The red bar indicates the B to C horizon  
 920 transition as given in Bernhard et al. (2018). Uphill is from left to right. Note that in  
 921 the radar data the air wave and background removal is applied.

922

923 Fig. 13:

924 1000 MHz GPR signal and envelope for the mid-slope position of the S-facing  
 925 hillslope position in Santa Gracia (SGPED40). The hillslope transect spans over ~20





926 m. Interpretation of the radar signal are indicated where possible (stippled lines in A  
927 and B). The potential soil thickness is indicated based on the envelope profile. Uphill  
928 is from left to right. Lines and symbols in figures as described in Fig. 12.

929

930 Fig. 14:

931 500 MHz GPR signal and envelope for the mid-slope position of the S-facing  
932 hillslope in La Campana (LCPED20). The hillslope transect spans over ~8 m.  
933 Interpretation of the radar signal are indicated where possible (stippled and black  
934 lines in A and B). The potential soil thickness is indicated based on the envelope  
935 profile. Uphill is from left to right. Lines and symbols in figures as described in Fig.  
936 12.

937

938 Fig. 15:

939 500 MHz GPR signal and envelope for the mid-slope position of the S-facing  
940 hillslope in Nahuelbuta (NAPED20). The hillslope transect spans over ~20 m.  
941 Interpretation of the radar signal are indicated where possible (stippled lines in A  
942 and B). The potential soil thickness is indicated based on the envelope profile. Uphill  
943 is from left to right. Lines and symbols in figures as described in Fig. 12.

944

945



946 Fig. 1:

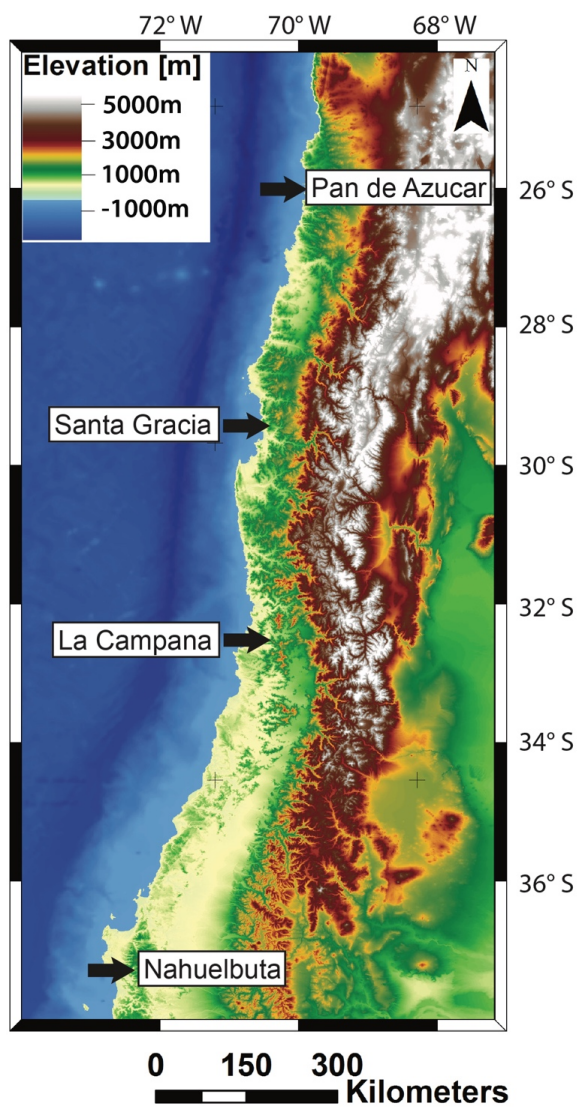

947  
 948

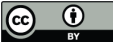

949 Fig. 2:

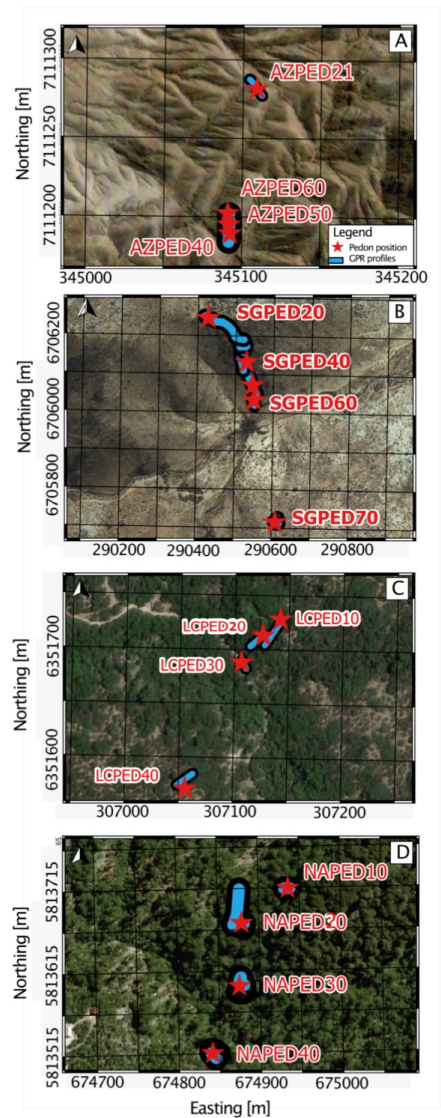



951 Fig. 3:  
 952

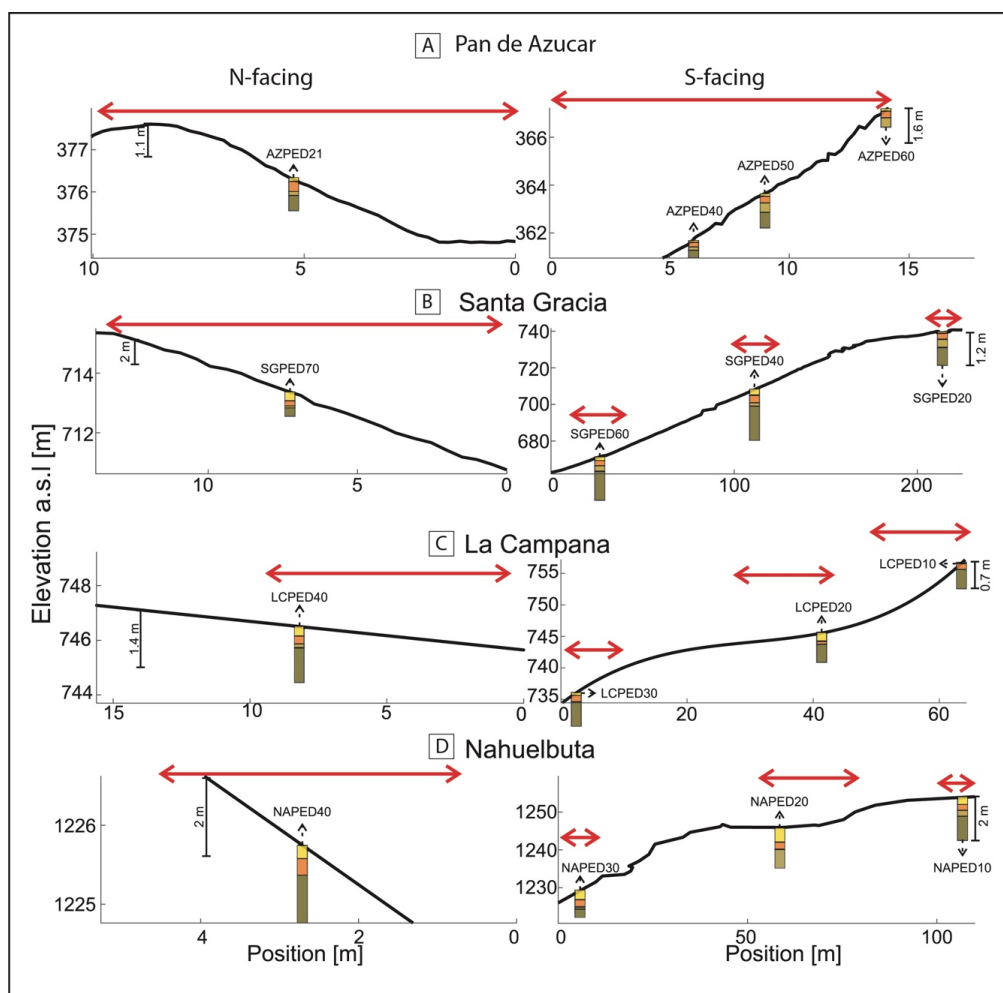

953  
 954

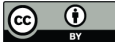

955  
956  
957 Fig. 4:

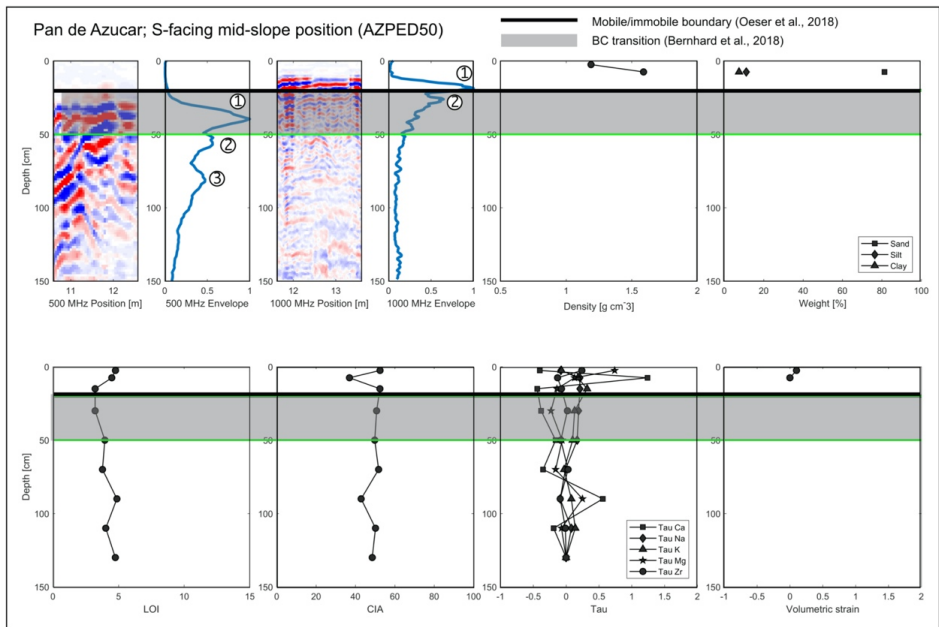

958  
959  
960 Fig. 5:  
961

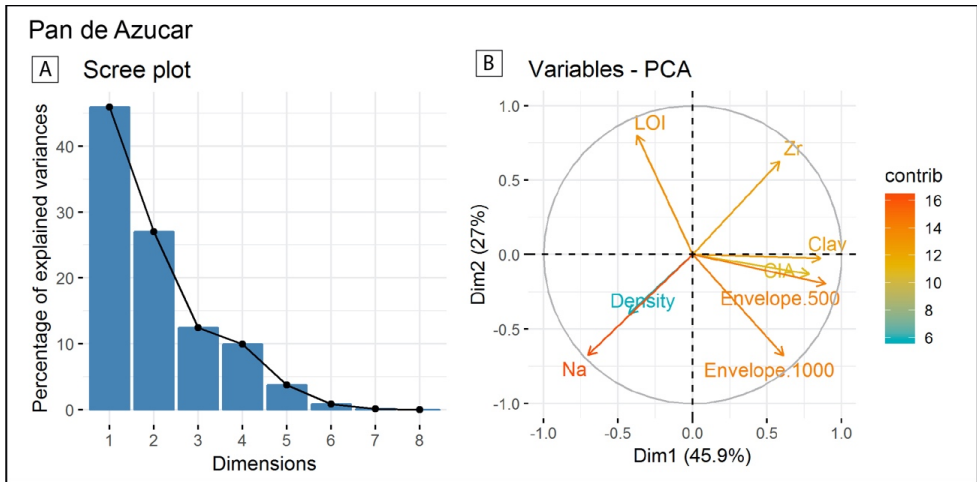

962



963  
964  
965  
966 Fig. 6:

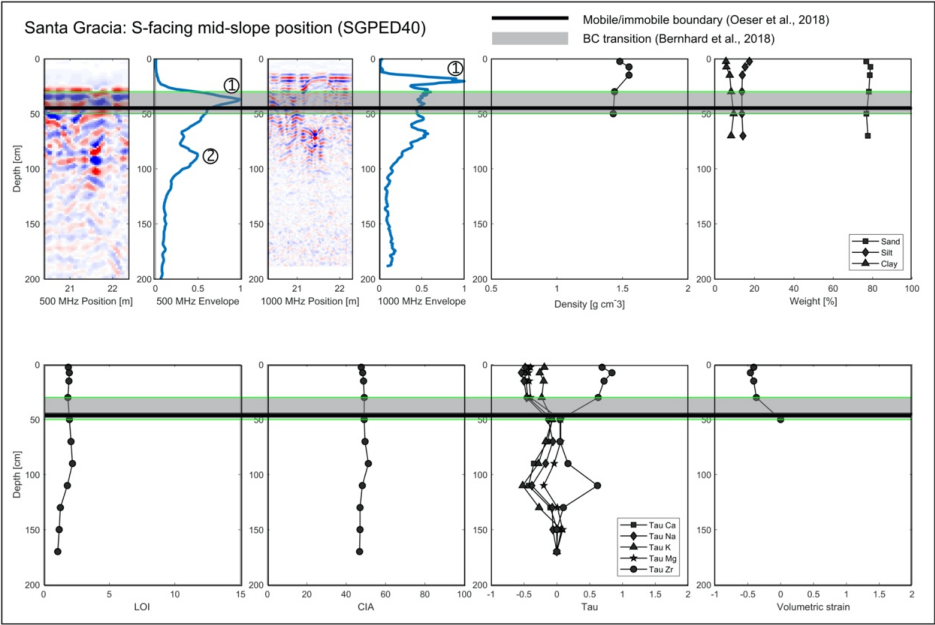

967  
968  
969 Fig. 7:

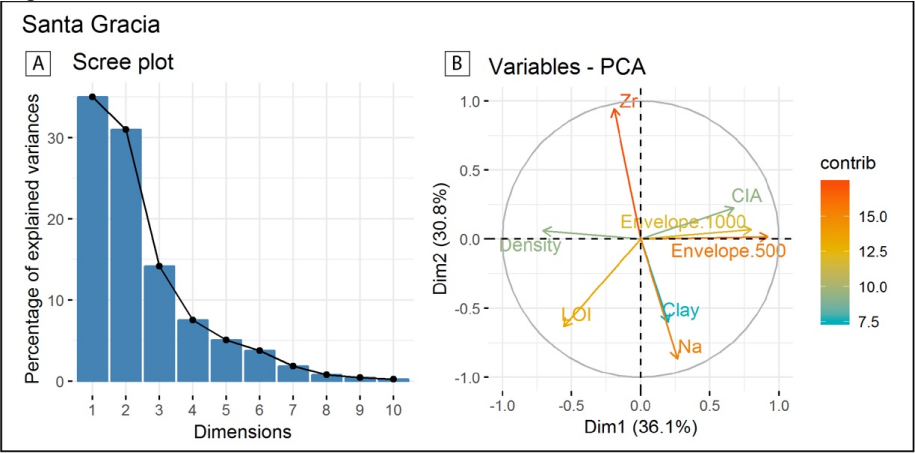

970



971  
972  
973  
974  
975  
976 Fig. 8:

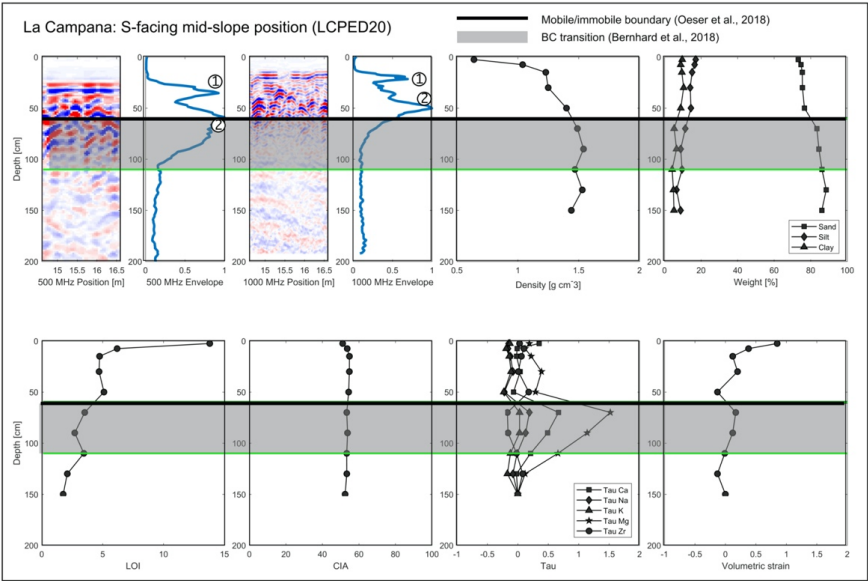

977  
978  
979 Fig. 9:

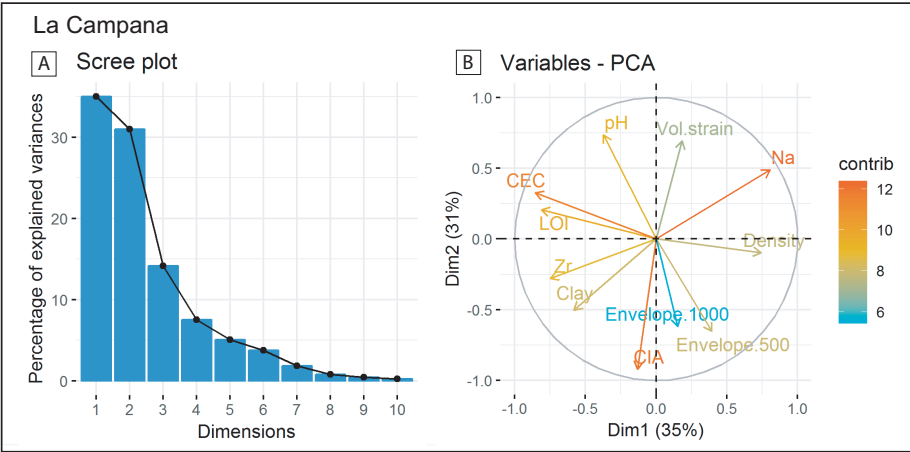

980





981 Fig. 10:

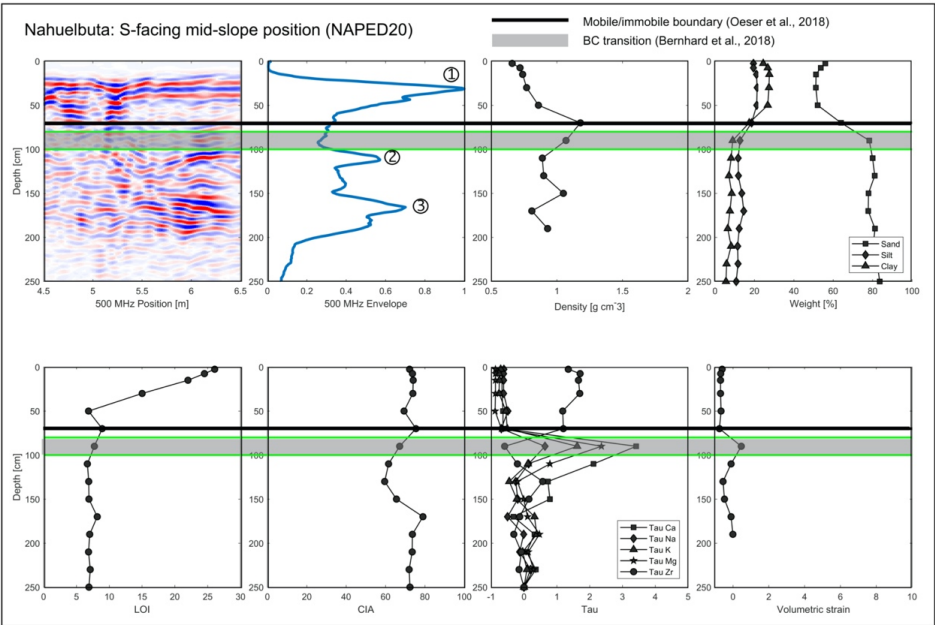

982  
983  
984 Fig. 11:

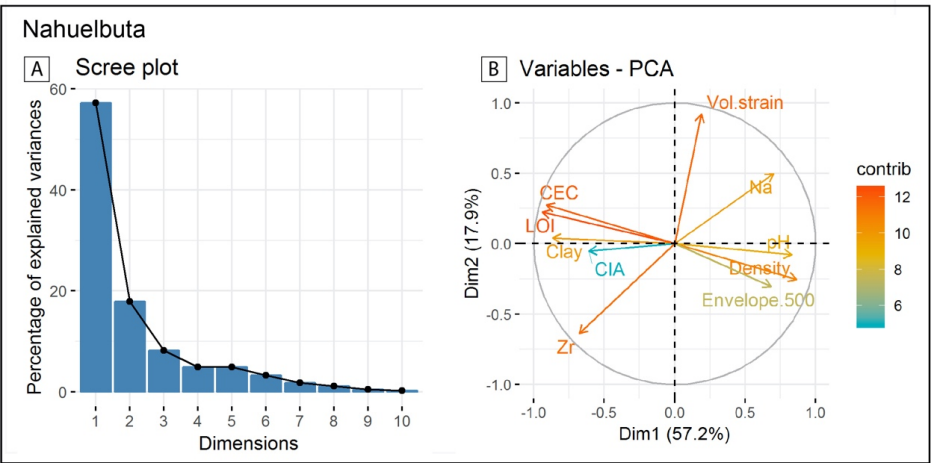

985  
986  
987  
988





989 Fig. 12:  
 990

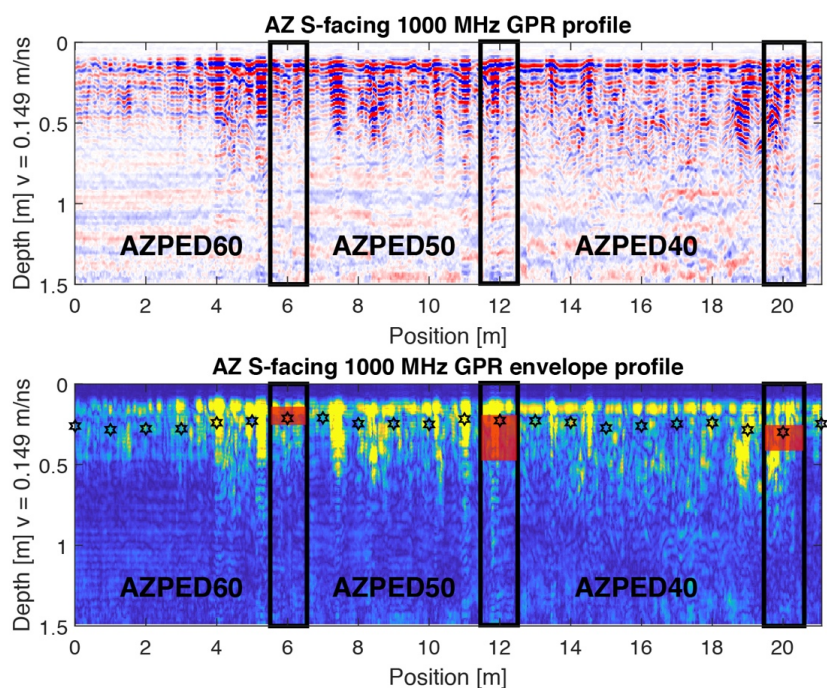

991  
 992  
 993



994 Fig. 13:

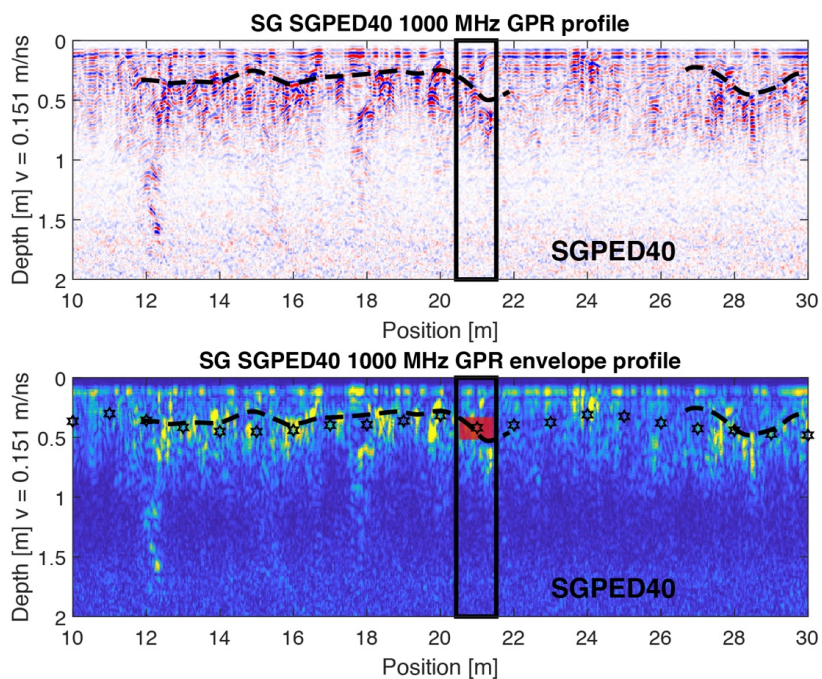

995  
 996



997 Fig. 14:  
998

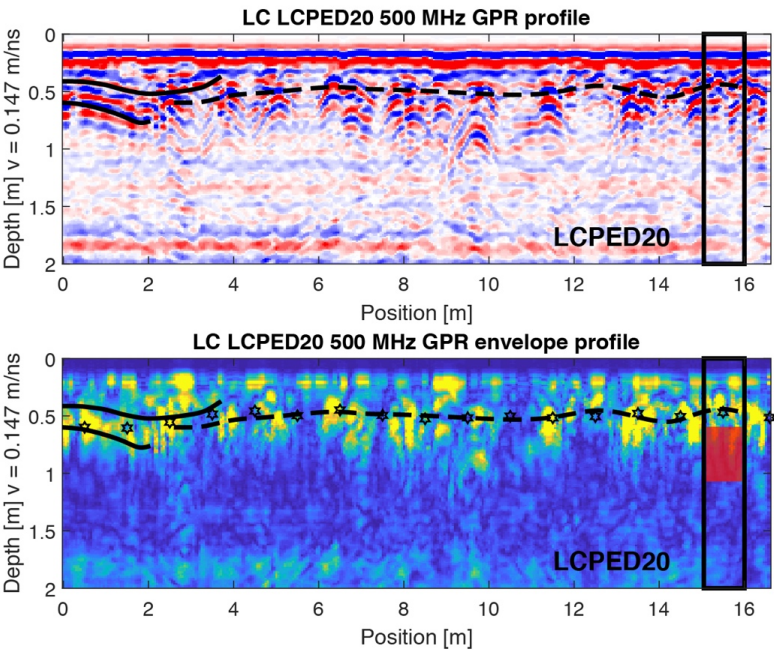

999  
1000  
1001



1002 Fig. 15:  
 1003

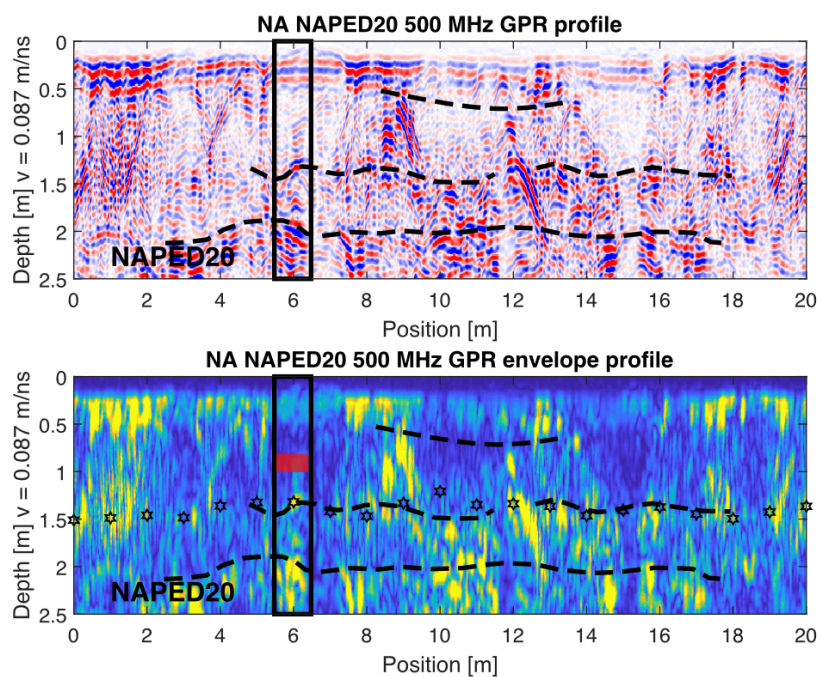

1004  
 1005

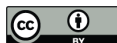

1006 Table 1:  
1007

| Property                     | Abbreviation               | Units                 | Meaning                                                   | Reference                       |
|------------------------------|----------------------------|-----------------------|-----------------------------------------------------------|---------------------------------|
| Soil bulk density            | $\rho_b$                   | g/cm <sup>3</sup>     | Weight of unit volume                                     | Bernhard et al., 2018           |
| Grain size distribution      | GSD                        | %                     | Weight percent of different grain sizes smaller than 2 mm | Bernhard et al., 2018           |
| Potential hydrogen           | pH                         |                       | Acid and base properties                                  | Bernhard et al., 2018           |
| Cation exchange capacity     | CEC                        | cmol <sub>c</sub> /kg | Soil ability to hold positively charged ions              | Bernhard et al., 2018           |
| Loss on ignition             | LOI                        | %                     | Loss of volatiles due to excessiv heating                 | Oeser et al., 2018              |
| Chemical index of alteration | CIA                        |                       | Degree of weathering                                      | Oeser et al., 2018              |
| Mass transfer coefficient    | $\tau$                     | m/s                   | Chemical gain or loss                                     | Oeser et al., 2018              |
| Volumetric strain            | $\epsilon_{\text{strain}}$ |                       | Volumetric gain or loss                                   | Oeser et al., 2018              |
| Electric permittivity        | $\epsilon_r$               |                       | Structural changes, porosity/soil water content           | Dal Bo et al., 2019; This study |
| Electrical conductivity      | $\sigma$                   | mS/m                  | Clay, salinity                                            | Dal Bo et al., 2019; This study |

1008  
1009  
1010  
1011  
1012  
1013  
1014 Table 2:

| Table 2: Data compilation for pedons in the investigated four study areas in the Chilean Coastal Cordillera |          |          |               |          |             |            |                                            |                                   |                                   |                          |                                |                |                                   |                |
|-------------------------------------------------------------------------------------------------------------|----------|----------|---------------|----------|-------------|------------|--------------------------------------------|-----------------------------------|-----------------------------------|--------------------------|--------------------------------|----------------|-----------------------------------|----------------|
| Soil profile                                                                                                | Location |          | Altitude<br>m | Position | Aspect<br>° | Slope<br>° | Field observations                         |                                   |                                   |                          | GPR point depth <sup>(5)</sup> |                | GPR transect depth <sup>(6)</sup> |                |
|                                                                                                             | °S       | °W       |               |          |             |            | BC-horizon transition <sup>(1)</sup><br>cm | Mobile/mmob. <sup>(2)</sup><br>cm | Mobile/mmob. <sup>(3)</sup><br>cm | GPR <sup>(4)</sup><br>cm | 500 MHz<br>cm                  | 1000 MHz<br>cm | 500 MHz<br>cm                     | 1000 MHz<br>cm |
|                                                                                                             |          |          |               |          |             |            |                                            |                                   |                                   |                          |                                |                |                                   |                |
| <b>Pan de Azucar</b>                                                                                        |          |          |               |          |             |            |                                            |                                   |                                   |                          |                                |                |                                   |                |
| AZPED60                                                                                                     | 26.11012 | 70.54922 | 343           | top      | 60          | 5          | 14-26                                      |                                   | 22                                | 30-55 (?)                | 40                             | 20/25/45       |                                   |                |
| AZPED50                                                                                                     | 26.11027 | 70.54922 | 333           | mid      | 0           | 40         | 20-50                                      | 20                                | 20                                | 20-55                    | 40/50/70                       | 20/25/35/45    | 36 ± 1                            | 25 ± 3         |
| AZPED40                                                                                                     | 26.11024 | 70.54921 | 326           | toe      | 0           | 33         | 23-40                                      |                                   | 25                                | 20-40                    | 40/55                          | 20/30          |                                   |                |
| AZPED21                                                                                                     | 26.10936 | 70.54907 | 342           | mid      | 180         | 25         | 20-30                                      | 20                                | 20                                | 30-45                    | 37/55/75                       | 20/30/45/55    | 40 ± 2                            | 28 ± 3         |
| <b>Santa Gracia</b>                                                                                         |          |          |               |          |             |            |                                            |                                   |                                   |                          |                                |                |                                   |                |
| SGPED20                                                                                                     | 29.75636 | 71.16721 | 718           | top      | 240         | 5          | 20-30                                      |                                   | 30                                | 30                       | 40                             | 20/30/40/50    | 37 ± 5                            | 34 ± 3         |
| SGPED40                                                                                                     | 29.75738 | 71.16635 | 682           | mid      | 0           | 25         | 30-50                                      | 50                                | 45                                | 60                       | 45                             | 10/30/40/55/65 | 40 ± 7                            | 36 ± 5         |
| SGPED60                                                                                                     | 29.75826 | 71.16615 | 638           | toe      | 0           | 20         | 40-60                                      |                                   | 55                                | -                        | 37/50                          | 20/30          | 39 ± 7                            | 35 ± 6         |
| SGPED70                                                                                                     | 29.76120 | 71.16559 | 690           | mid      | 180         | 15         | 25                                         | 35                                | 35                                | NA                       | 40                             | 20/30          | 35 ± 3                            | 28 ± 2         |
| <b>La Campana</b>                                                                                           |          |          |               |          |             |            |                                            |                                   |                                   |                          |                                |                |                                   |                |
| LCPED10                                                                                                     | 32.95581 | 71.06332 | 734           | top      | 60          | 7          | 34                                         |                                   | 45                                | 40/50                    | 35/50/70                       | 10/30/35/50/65 | 55 ± 6                            | 44 ± 5         |
| LCPED20                                                                                                     | 32.95588 | 71.06355 | 718           | mid      | 0           | 23         | 60-110                                     | 60                                | 60                                | 50/60                    | 35/60/70                       | 20/38/50       | 59 ± 6                            | 45 ± 4         |
| LCPED30                                                                                                     | 32.95615 | 71.06380 | 708           | toe      | 60          | 35         | 34-55                                      |                                   | 55                                | 45/50                    | 35/70                          | 20/30/38       | 50 ± 9                            | 41 ± 4         |
| LCPED40                                                                                                     | 32.95720 | 71.06425 | 724           | mid      | 120         | 12         | 36-103                                     | 35                                | 35                                | -                        | 35/65                          | 20/30/40       | 56 ± 6                            | 47 ± 6         |
| <b>Nahuelbuta</b>                                                                                           |          |          |               |          |             |            |                                            |                                   |                                   |                          |                                |                |                                   |                |
| NAPED10                                                                                                     | 37.80735 | 73.01285 | 1248          | top      | 60          | 5          | 50-75                                      |                                   | 70                                | 70/75                    | 35/45/120                      |                | 82 ± 15                           |                |
| NAPED20                                                                                                     | 37.80770 | 73.01357 | 1239          | mid      | 60          | 15         | 80-100                                     | 95                                | 70                                | 75/95                    | 35/110/170                     |                | 101 ± 8                           |                |
| NAPED30                                                                                                     | 37.80838 | 73.01345 | 1228          | toe      | 0           | 20         | 63-85                                      |                                   | 90                                | -                        | 5/90/120/140                   |                | 96 ± 6                            |                |
| NAPED40                                                                                                     | 37.80904 | 73.01380 | 1200          | mid      | 180         | 13         | 65-90                                      | 70                                | 60                                | 40/50                    | 40/80/120                      |                | 95 ± 11                           |                |
| <sup>(1)</sup> Depth of BC-horizon transition from Bernhard et al., 2018                                    |          |          |               |          |             |            |                                            |                                   |                                   |                          |                                |                |                                   |                |
| <sup>(2)</sup> Depth of mobile layer from Schaller et al., 2018                                             |          |          |               |          |             |            |                                            |                                   |                                   |                          |                                |                |                                   |                |
| <sup>(3)</sup> Depth of mobile layer from Oeser et al., 2018                                                |          |          |               |          |             |            |                                            |                                   |                                   |                          |                                |                |                                   |                |
| <sup>(4)</sup> Depth based on data from Dal Bo et al., 2019                                                 |          |          |               |          |             |            |                                            |                                   |                                   |                          |                                |                |                                   |                |
| <sup>(5)</sup> Depth based on single point GPR envelopes (This study)                                       |          |          |               |          |             |            |                                            |                                   |                                   |                          |                                |                |                                   |                |
| <sup>(6)</sup> Average depth based on envelopes from GPR transect data (This study)                         |          |          |               |          |             |            |                                            |                                   |                                   |                          |                                |                |                                   |                |

1015  
1016  
1017  
1018  
1019
